# Supplementary material
Source: PubMed Central journal article supplement (PMC4334727)

**DUSP3 Phosphatase Deficiency or Inhibition Limit Platelet Activation and Arterial  
Thrombosis**

Musumeci: DUSP3, a new player in arterial thrombosis

**Supplementary material**

## Methods and reagents

### Antibodies, reagents, and recombinant PTPs

Fluorescein isothiocyanate (FITC)-conjugated anti-P-selectin, and phycoerythrin (PE)-conjugated anti-active integrin  $\alpha_{IIb}\beta_3$  (JON/A) antibodies were from Emfret Analytics (Würzburg, Germany). Anti-Fyn, anti-phosphotyrosine antibody (4G10) and anti-Fc $\gamma$  subunit and mouse anti-rabbit light chain specific-HRP were from Millipore (Billerica, MA). Antibodies against Syk, Syk p-Tyr 525/526, Syk p-Tyr 323, Lyn p-Tyr-507, ERK (p44/42), p-ERK1/2 (Thr202/Tyr204), p38 MAPK, and p-p38 (Thr180/Tyr182) were from Cell Signaling (Danvers, MA). Anti-Src p-Tyr-416/418, anti-Src p-Tyr-529, and anti-Src pan antibodies were from Fisher Scientific (Erembodegem, Belgium). Anti-Fyn p-Tyr-530 was from Abcam (Cambridge, UK). Anti-Lyn and anti-DUSP3/VHR used for mice samples (sc-8889) were from Santa-Cruz (Santa Cruz, CA). Anti-DUSP3/VHR antibody used for human samples (Clone 24/VHR), FITC-conjugated anti-CD3, PE-conjugated anti-B220, APC-Cy7-conjugated anti-Ly6G, PerCP-Cy5-conjugated anti-NK1.1 and Alexa-647 conjugated anti-rat antibodies were from BD Biosciences (Erembodegem, Belgium). Anti-CLEC2 antibody (clone 17D9) was from Serotec (Puchheim, Germany). Anti-vWF antibody was from Dako (Heverlee, Belgium). Goat anti-mouse kappa HRP-conjugated was from Southern Biotech (Birmingham, AL).

D-Phe-Pro-Ala-chloromethylketone (PPACK) was from Calbiochem (San Diego, CA). Fibrillar-type I equine tendon collagen was from Nycomed (Zurich, Switzerland). Bovine thrombin, ADP, and U46619 were from Sigma-Aldrich (Diegem, Belgium). Cross-linked collagen-related peptide (CRP) was provided by Prof. R.W. Farndale's laboratory. Rhodocytin was purified from *C. rhodostoma* venom as described previously. [1] Annexin A5 labeled with Oregon Green OG488 and Fura-2 were from Molecular Probes (Leiden, the Netherlands). Convulxin was obtained from Kordia (Leiden, the Netherlands).

Para-nitrophenyl phosphate (pNPP), 3-O-methylfluorescein phosphate (OMFP), and dithiothreitol (DTT), and sodium orthovanadate ( $\text{Na}_3\text{VO}_4$ ) were purchased from Sigma-Aldrich. Biomol Green reagent was from Biomol Research Laboratories, Inc. (Plymouth Meeting, PA). Compounds for follow-up studies were purchased from Specs or ChemBridge. All compounds had a purity of >95% (verified by LC/MS and  $^1\text{H-NMR}$ ). Compounds chosen for cell-based assays were additionally repurified to >99% purity, and activity of the repurified substance was confirmed. All other chemicals and reagents were of the highest grade commercially available. Recombinant DUSP3, DUSP6, DUSP22, HePTP, LYP, PTP-SL, and STEP were expressed in *E. coli* and purified as described previously. [2-4] Recombinant CD45, TCPTP, LAR, and PTP1B were from Biomol Research Laboratories, Inc (Plymouth Meeting, PA, USA).

#### **Platelet RNA sampling and Microarray**

Platelet rich plasma (PRP) was prepared from citrate anticoagulated-blood. Depletion of CD45+ leukocytes was performed before total RNA extraction from freshly purified platelets using RNeasy Mini Kit on a QIAcube (Qiagen, Venlo, The Netherlands) and stored at  $-80^\circ\text{C}$  until used. RNA was quantified by absorbance measurement, and 200 ng of RNA were engaged in reverse transcription with oligo-dT primers (Superscript III RT, Invitrogen), prior to biotin labeling and amplification using the TargetAmp Nano-g Biotin-aRNA Labeling Kit for the Illumina System (Epicentre). Biotin-labeled aRNA were purified using the RNeasy MinElute Cleanup Kit (Qiagen) and 400 ng were hybridized on Human HT-12 v4 arrays (Illumina) following the recommendations of the manufacturer. Arrays were scanned on an iScan microarray scanner (Illumina). Internal controls of the arrays were analyzed for quality control. Cell-specific expression markers were analyzed in all samples, ruling out contamination of platelet RNA with leukocyte RNA. Indeed, in this assay, comparison of the different DSPs mRNA levels is not possible. The raw fluorescence intensities for the probes

corresponding to the atypical DSPs have been corrected for the fluorescence background signal for each sample on the array by subtracting the fluorescence intensity of the negative control probes on the array. The data have then been normalized by dividing the intensity for each probe in each sample by the mean fluorescence intensity of 7 housekeeping genes (EEF1A1, UBC, ACTB, RPS9, GAPDH, TUBB2A and TXN) in the same sample. The data are presented as a ratio of the fluorescence intensity for the probe of interest and the mean fluorescence intensity for the housekeeping genes of each sample. A negative value corresponds to a lack of detection of the expression of the gene (expression level below the background).

### **Chemical Library Screening for DUSP3 inhibitors**

DUSP3 HTS was performed within the MLPCN network, PubChem AID 1654. A total of 291,018 compounds (comprising the full MLPCN library at the time of screening) were screened at a concentration of 13.3  $\mu$ M. A colorimetric phosphatase assay was set up in 1536-well format, using the general phosphatase substrate pNPP.[5, 6] The assay buffer contained 20 mM Bis-Tris (pH 6.0), 1 mM DTT, and 0.005% Tween-20. A detailed protocol of the HTS assay was published previously.[7]

### **Single-concentration confirmatory assays for DUSP3 hits using OMFP.**

Phosphatase activity was measured in triplicate in a 1536-well format assay system, using the fluoresceine-based phosphatase substrate OMFP. The assay buffer contained 20 mM Bis-Tris (pH 6.0), 1 mM DTT, and 0.005% Tween-20. For a detailed protocol please see ref. 7.

### **Selectivity profiling assays.**

Selectivity of compounds for inhibiting DUSP3 was tested against 10 additional PTPs using a 96-well format dose-response assay system with OMFP as substrate.[2] Enzyme concentrations were as follows: DUSP3, 2 nM; DUSP6, 10 nM; DUSP22, 10 nM; PTP-SL, 5 nM; HePTP, 5 nM; LYP, 5 nM; TCPTP, 2 nM; CD45, 2 nM; LAR, 1U/mL; STEP, 5 nM;

and PTP1B, 5 nM. OMFP was used at concentrations equal to the corresponding  $K_m$  values: DUSP3, 13  $\mu\text{M}$ ; DUSP6, 50  $\mu\text{M}$ ; DUSP22, 2.2  $\mu\text{M}$ ; PTP-SL, 28  $\mu\text{M}$ ; HePTP, 117  $\mu\text{M}$ ; LYP, 185  $\mu\text{M}$ ; TCPTP, 56  $\mu\text{M}$ ; CD45, 347  $\mu\text{M}$ ; LAR, 78  $\mu\text{M}$ ; STEP, 32  $\mu\text{M}$ ; and PTP1B, 99  $\mu\text{M}$ . The initial rate was determined using a FLx800 micro plate reader (Bio-Tek Instruments, Inc.), an excitation wave length of 485 nm and measuring the emission of the fluorescent reaction product 3-O-methylfluorescein at 525 nm. The nonenzymatic hydrolysis of the substrate was corrected by measuring the control without addition of enzyme.  $IC_{50}$  values for each enzyme were determined as described previously.[2]

## References

1. Eble, J.A., B. Beermann, H.J. Hinz, and A. Schmidt-Hederich. alpha 2beta 1 integrin is not recognized by rhodocytin but is the specific, high affinity target of rhodocetin, an RGD-independent disintegrin and potent inhibitor of cell adhesion to collagen. *J Biol Chem.* 2001;276:12274-84.
2. Wu, S., S. Vossius, S. Rahmouni, A.V. Miletic, T. Vang, J. Vazquez-Rodriguez, F. Cerignoli, Y. Arimura, S. Williams, T. Hayes, M. Moutschen, S. Vasile, M. Pellecchia, T. Mustelin, and L. Tautz. Multidentate small-molecule inhibitors of vaccinia H1-related (VHR) phosphatase decrease proliferation of cervix cancer cells. *J Med Chem.* 2009;52:6716-23.
3. Sergienko, E., J. Xu, W.H. Liu, R. Dahl, D.A. Critton, Y. Su, B.T. Brown, X. Chan, L. Yang, E.V. Bobkova, S. Vasile, H. Yuan, J. Rascon, S. Colayco, S. Sidique, N.D. Cosford, T.D. Chung, T. Mustelin, R. Page, P.J. Lombroso, and L. Tautz. Inhibition of hematopoietic protein tyrosine phosphatase augments and prolongs ERK1/2 and p38 activation. *ACS Chem Biol.* 2012;7:367-77.
4. Alonso, A., J.J. Merlo, S. Na, N. Kholod, L. Jaroszewski, A. Kharitonov, S. Williams, A. Godzik, J.D. Posada, and T. Mustelin. Inhibition of T cell antigen receptor signaling by VHR-related MKPX (VHX), a new dual specificity phosphatase related to VH1 related (VHR). *J Biol Chem.* 2002;277:5524-8.
5. Tautz, L. and T. Mustelin. Strategies for developing protein tyrosine phosphatase inhibitors. *Methods.* 2007;42:250-60.
6. Tautz, L. and E.A. Sergienko. High-throughput screening for protein tyrosine phosphatase activity modulators. *Methods Mol Biol.* 2013;1053:223-40.
7. Bobkova, E.V., W.H. Liu, S. Colayco, J. Rascon, S. Vasile, C. Gasior, D.A. Critton, X. Chan, R. Dahl, Y. Su, E. Sergienko, T.D. Chung, T. Mustelin, R. Page, and L.

Tautz. Inhibition of the Hematopoietic Protein Tyrosine Phosphatase by Phenoxyacetic Acids. *ACS Med Chem Lett.* 2011;2:113-118.

## Figure Legends

### **Figure S1.** *Surface expression of major platelet receptors on *Dusp3*-deficient platelets.*

Resting WT and *Dusp3*-KO platelets were stained with (A) anti-GPVI-FITC, (B) anti-CD41-FITC, (C) anti-CD42C/GPIb-FITC, and (D) anti-CD42D/GPV-FITC and analyzed by flow cytometry. Anti-mouse IgG-FITC (grey line) was used as a negative control antibody for the staining. Representative histograms with the mean fluorescence intensity (MFI) for WT (dark line) and *Dusp3*-KO (dashed line) are shown for each staining.

### **Figure S2.** *CLEC-2 surface expression in platelets and mononucleated cells.*

(A) Resting WP from WT and *Dusp3*-KO platelets were stained with anti-CLEC-2 antibody followed by a secondary staining using Alexa-647 conjugated anti-rat antibody and FITC-conjugated anti-CD41. A rat-anti-mouse antibody was used as a negative control (grey line). (B) Resting splenocytes from WT and *Dusp3*-KO mice were stained using PE-conjugated anti-B220, FITC-conjugated anti-CD3, APC-Cy7-conjugated anti-Ly6G, PerCP-Cy5-conjugated anti-NK1.1 and anti-CLEC-2 followed by Alexa-647 conjugated anti-rat antibody. CD3<sup>+</sup> (T lymphocytes), B220<sup>+</sup> (B Lymphocytes), Ly6G<sup>+</sup> (Neutrophils) and NK1.1<sup>+</sup> (NK cells) were separately gated out of total live cells and analyzed for the expression of CLEC-2. Representative histograms with the % of Max of the mean fluorescence intensity for WT (dark line) and *Dusp3*-KO (grey line) are shown for each staining.

### **Figure S3.** *MAPKs activation in *Dusp3*-KO platelets.*

Total cell lysates (TCLs) were prepared from CRP (0.3 µg/mL) activated WT or *Dusp3*-KO mouse platelets. Cells were non-activated or activated for 30, 90, and 300 s (for MAPKs) or 30, 60, and 90 s (for SFKs) with CRP. Equal amounts of protein were resolved by SDS-PAGE, and western blot analysis was performed using: Anti-phospho-ERK1/2 (Thr202/Tyr204), anti-JNK1/2 (Thr183/Tyr185), and anti-phospho-p38 (Thr180/Tyr182). Anti-ERK1/2, anti-JNK1/2, and anti-p38 were used as loading controls.



**Figure S4.** *Quantification of Syk, FcR $\gamma$ , and PLC $\gamma$  tyrosine phosphorylation and recruitment of Syk to FcR $\gamma$ .* Densitometric analysis of results presented in Figure 4 for tyrosine phosphorylation of immunoprecipitated Syk (Figure 4D and 4E) in CRP-activated conditions (A) and in rhodocytin stimulated conditions (B). Quantification of Syk phosphorylation on Tyr-323 and Tyr-525/526 (shown in Figure 4F and 4G) in CRP (C-D) or rhodocytin (E-F) activated platelets. Normalization was performed using total Syk. (G) Quantification of tyrosine phosphorylation (4G10) western blots on FcR $\gamma$  immunoprecipitates. (H) Quantification of Syk recruitment to Fc $\gamma$ R. (I-J) Statistical analysis of tyrosine phosphorylation (4G10) of PLC $\gamma$ 2 immunoprecipitates from equal amounts of TCLs from CRP (I) or rhodocytin (J) activated platelets. Data were analyzed using Anova Bonteferroni multiple comparison test and are presented as mean  $\pm$  SEM. Statistical analyses are shown for three independent experiments, each experiment was performed using pooled platelets from three mice.

**Figure S5.** *SFK activation in Dusp3-KO platelets.* Total cell lysates (TCLs) were prepared from CRP (0.3  $\mu$ g/mL) or rhodocytin (10nM) activated WT or Dusp3-KO mouse platelets. Cells were non-activated or activated for 30, 60, and 90 s with CRP (A) or with rhodocytin (B). Equal amounts of protein were resolved by SDS-PAGE, and western blot analysis was performed using: Anti-phospho-Src (Tyr416), anti-phospho-Src (Tyr529), anti-phospho-Fyn (Tyr530), or anti-phospho-Lyn (Tyr507). Anti-Src and anti-Fyn were used as loading controls. Data were analyzed using Anova Bonteferroni multiple comparison test and are presented as mean  $\pm$  SEM. Results are representative of three independent experiments.

**Figure S6.** *Thapsigargin induced store mediated Ca<sup>2+</sup> entry and GPCR agonist-triggered intracellular Ca<sup>2+</sup> increase in Dusp3-KO platelets.* (A) Fura-2 loaded platelets were stimulated with thapsigargin (200 nM) before adding 500 mM CaCl<sub>2</sub>. (B-D) Platelets were stimulated with thrombin (IIA, 10 nM) (B), ADP (20 mM) (C), or TXA<sub>2</sub> mimetic U46619 (1

mM) (D). Traces are representative of three independent experiments.

**Figure S7.** *Platelet aggregate formation on whole blood on vWF coated surface.*

Anticoagulated blood from WT or *Dusp3*-KO mice was perfused over vWF-coated coverslip (1.4  $\mu\text{g}$ ) through a parallel-plate transparent flow chamber at a wall-shear rate of  $1000 \text{ s}^{-1}$  for 4 min. Representative phase-contrast images of fixed platelets (**A**) and percentages of surface coverage by platelets (**B**) are shown. Results were analyzed using unpaired Student t-test. Data represent mean  $\pm$  SEM of three independent experiments; ns=non significant.

**Table S1.** Hematological parameters of WT and DUSP3-KO mice.

|                                    | <b>WT (n=19)</b> | <b>DUSP3-KO (n=16)</b> | <b>P Value</b> |
|------------------------------------|------------------|------------------------|----------------|
| WBC (x10 <sup>3</sup> /mL)         | 4.353±0.3183     | 4.234±0.3369           | 0.7998 (ns)    |
| Lymphocytes (x10 <sup>3</sup> /mL) | 3.339±0.2416     | 3.299±0.2678           | 0.9134 (ns)    |
| Neutrophils (x10 <sup>3</sup> /mL) | 0.6053±0.0811    | 0.5575±0.0699          | 0.6663 (ns)    |
| Monocytes (x10 <sup>3</sup> /mL)   | 0.1841±0.01791   | 0.1296±0.0130          | 0.0232 (*)     |
| Eosinophils (x10 <sup>3</sup> /mL) | 0.01864±0.008395 | 0.02956±0.01254        | 0.4567 (ns)    |
| Basophils (x10 <sup>3</sup> /mL)   | 0.2019±0.01793   | 0.1999±0.01662         | 0.9356 (ns)    |
| Platelets (x10 <sup>3</sup> /mL)   | 835 ± 27         | 905 ± 23               | 0.0577 (ns)    |
| Hgb (g/dL)                         | 10.73±0.2125     | 11.24±0.1594           | 0.0729 (ns)    |
| HCT (%)                            | 34.93±0.5836     | 36.49±0.5274           | 0.0584 (ns)    |
| MPV                                | 5.475±0,046      | 5.099±0,06             | <0.0001 (***)  |

**Table S2.** Potency and selectivity of 35 selected DUSP3 inhibitors. IC<sub>50</sub> values are in  $\mu\text{M}$ ; phosphatase substrates used are given in parentheses (OMFP or pNPP).

| Compound ID | Structure                                                                           | DUSP3 (OMFP) | DUSP3 (pNPP) | DUSP6 (OMFP) | HePTP (OMFP) | LYP (OMFP) | STEP (OMFP) |
|-------------|-------------------------------------------------------------------------------------|--------------|--------------|--------------|--------------|------------|-------------|
| MLS-0326173 | 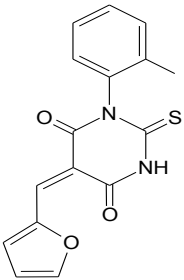   | <1.23        | <1.23        | <1.23        | n/d          | n/d        | n/d         |
| MLS-0322508 |   | <1.23        | <1.23        | <1.23        | n/d          | n/d        | n/d         |
| MLS-0347633 |  | <1.23        | <1.23        | 1.36         | n/d          | n/d        | n/d         |
| MLS-0103602 |  | <1.23        | 3.34         | >100         | <1.23        | n/d        | 5.11        |

|                 |                                                                                     |      |      |      |       |       |      |
|-----------------|-------------------------------------------------------------------------------------|------|------|------|-------|-------|------|
| MLS-<br>0044298 | 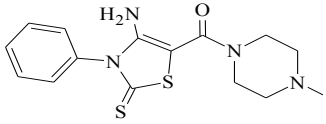   | 1.27 | 3.53 | >100 | <1.23 | <1.23 | n/d  |
| MLS-<br>0330044 |    | 2.09 | 4.01 | >100 | <1.23 | 21    | 3.86 |
| MLS-<br>0307023 |   | 2.44 | 4.31 | >100 | <1.23 | >100  | 14.5 |
| MLS-<br>0312565 |  | 2.52 | 1.3  | 27.3 | <1.23 | 2.13  | n/d  |
| MLS-<br>0049585 |  | 2.68 | 3.02 | >100 | 8.33  | 42    | >100 |

|                 |                                                                                     |      |       |      |       |       |      |
|-----------------|-------------------------------------------------------------------------------------|------|-------|------|-------|-------|------|
| MLS-<br>0029484 | 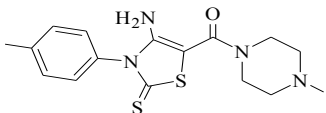   | 3.18 | 5.73  | >100 | <1.23 | n/d   | n/d  |
| MLS-<br>0146252 |    | 3.2  | <1.23 | 30.9 | <1.23 | 2.88  | n/d  |
| MLS-<br>0100722 |   | 3.25 | 1.89  | 7.9  | n/d   | n/d   | n/d  |
| MLS-<br>0273250 |  | 4.76 | 8.52  | >100 | n/d   | 9.73  | 6.57 |
| MLS-<br>0274366 |  | 4.8  | 2.43  | >100 | 2.52  | <1.23 | n/d  |

|                 |                                                                                     |      |       |      |       |       |      |
|-----------------|-------------------------------------------------------------------------------------|------|-------|------|-------|-------|------|
| MLS-<br>0266887 | 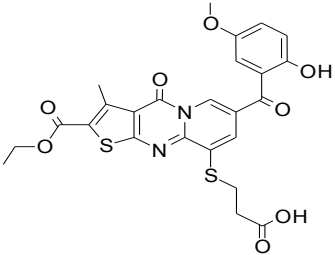   | 4.87 | <1.23 | 69.8 | <1.23 | n/d   | n/d  |
| MLS-<br>0350105 |    | 5.01 | <1.23 | 40.9 | <1.23 | 1.51  | n/d  |
| MLS-<br>0249773 |   | 5.02 | 4.04  | 10.1 | n/d   | n/d   | n/d  |
| MLS-<br>0109562 |  | 5.35 | 8.8   | >100 | <1.23 | n/d   | 17   |
| MLS-<br>0266851 |  | 5.44 | 3.69  | 68.6 | <1.23 | <1.23 | 2.18 |

|                 |                                                                                     |      |      |      |       |      |      |
|-----------------|-------------------------------------------------------------------------------------|------|------|------|-------|------|------|
| MLS-<br>0276952 | 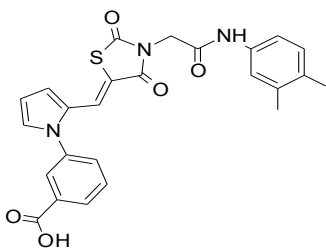   | 6.14 | 4.36 | 17.2 | n/d   | n/d  | n/d  |
| MLS-<br>0383777 |    | 6.72 | 1.88 | 62.7 | <1.23 | n/d  | n/d  |
| MLS-<br>0250197 |   | 7.26 | 2.27 | 9.04 | n/d   | n/d  | n/d  |
| MLS-<br>0276195 |  | 8.44 | 5.27 | 25.6 | n/d   | 22.9 | 4.09 |
| MLS-<br>0350978 |  | 9.18 | 6.94 | 32.3 | <1.23 | 10.6 | n/d  |



|                 |                                                                                     |      |      |      |       |      |     |
|-----------------|-------------------------------------------------------------------------------------|------|------|------|-------|------|-----|
| MLS-<br>0265159 | 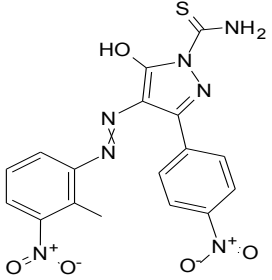   | 10.5 | 1.71 | 7.01 | n/d   | n/d  | n/d |
| MLS-<br>0343544 |    | 10.5 | 3.93 | 58.2 | <1.23 | 10.3 | n/d |
| MLS-<br>0319547 |   | 11.1 | 11.3 | 69.2 | n/d   | n/d  | n/d |
| MLS-<br>0335987 |  | 11.1 | 1.62 | 8.48 | 9.05  | 16.8 | n/d |
| MLS-<br>0351016 |  | 11.3 | 8.8  | 74.6 | <1.23 | 7.93 | n/d |

|                 |                                                                                     |      |      |      |     |     |      |
|-----------------|-------------------------------------------------------------------------------------|------|------|------|-----|-----|------|
| MLS-<br>0216485 | 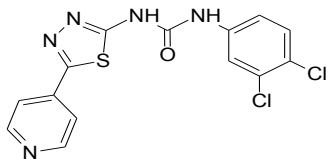   | 11.6 | 1.56 | 16.2 | n/d | n/d | n/d  |
| MLS-<br>0304619 |    | 12.9 | 6.94 | 31   | n/d | n/d | n/d  |
| MLS-<br>0202850 |   | 13.2 | 2.6  | 24   | n/d | n/d | n/d  |
| MLS-<br>0284989 |  | 13.9 | 5.73 | 25.8 | n/d | n/d | n/d  |
| MLS-<br>0308908 |  | 17.4 | 2.99 | 78.7 | n/d | 9   | 3.97 |

MLS-  
0312434

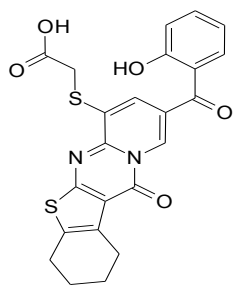

19

7.42

>100

<1.23

n/d

n/d

**Table S3.** SAR studies for compound MLS-0049585.

| Compound ID | Structure                                                                           | Result Graph                                                                         | IC <sub>50</sub> , μM | Std Error |
|-------------|-------------------------------------------------------------------------------------|--------------------------------------------------------------------------------------|-----------------------|-----------|
| MLS-0437609 | 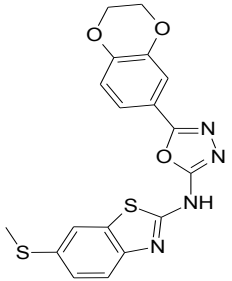   |    | 0.74                  | 0.08      |
| MLS-0049585 |   |   | 2.68                  | 0.47      |
| MLS-0437605 |  |  | 4.40                  | 0.69      |
| MLS-0111310 |  |  | 8.24                  | 0.74      |
| MLS-0437604 |  |  | 12.15                 | 1.25      |

MLS-  
0437606

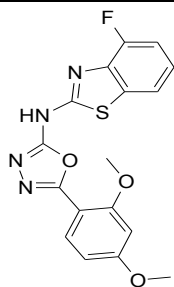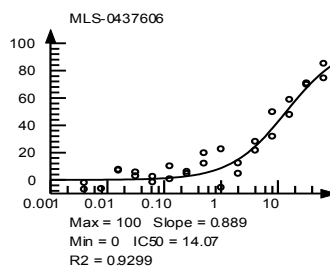

14.06 1.67

MLS-  
0437608

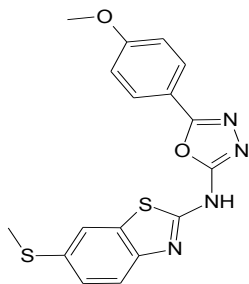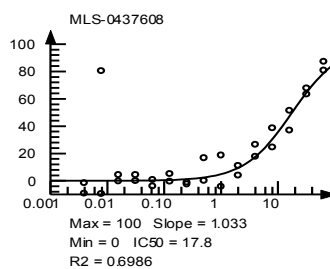

17.80 4.33

MLS-  
0049708

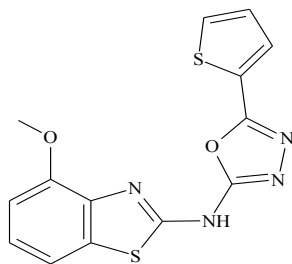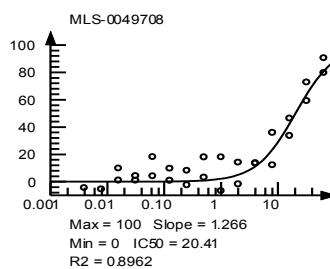

20.41 2.38

Figure S1

A.

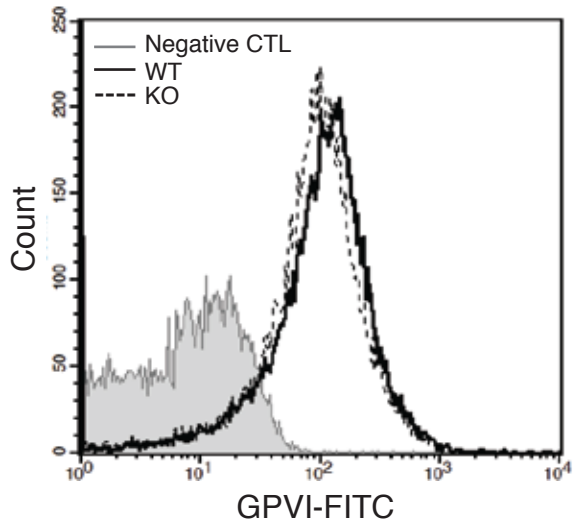

B.

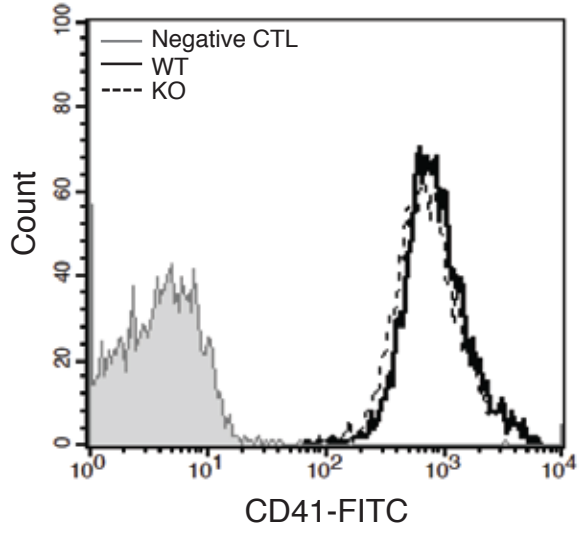

C.

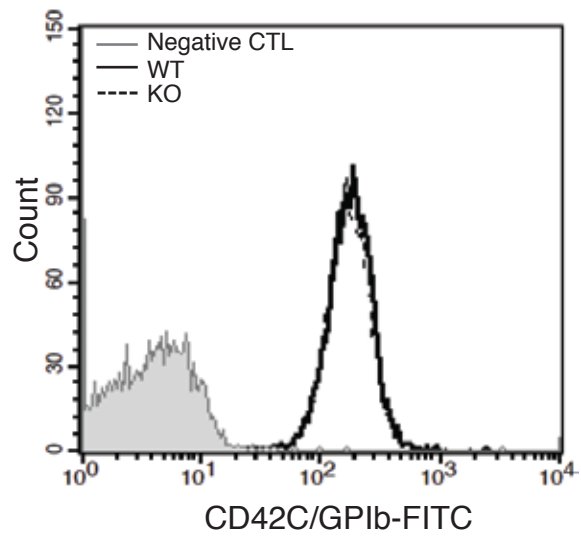

D.

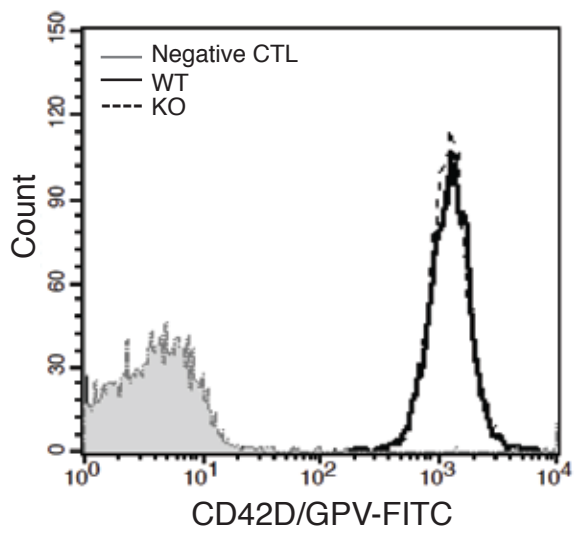

Figure S2

A.

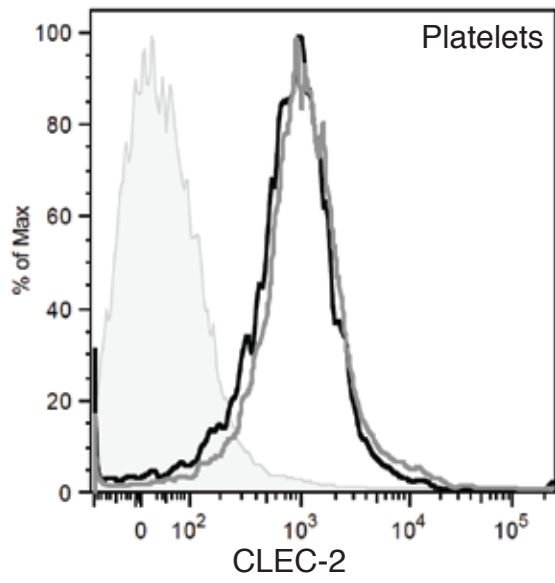

B.

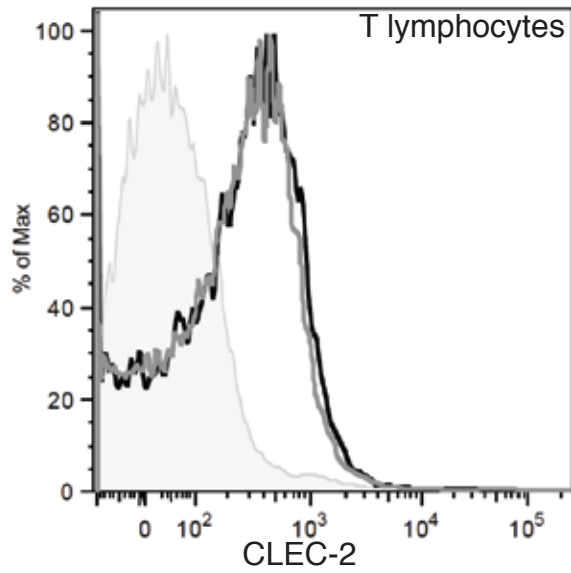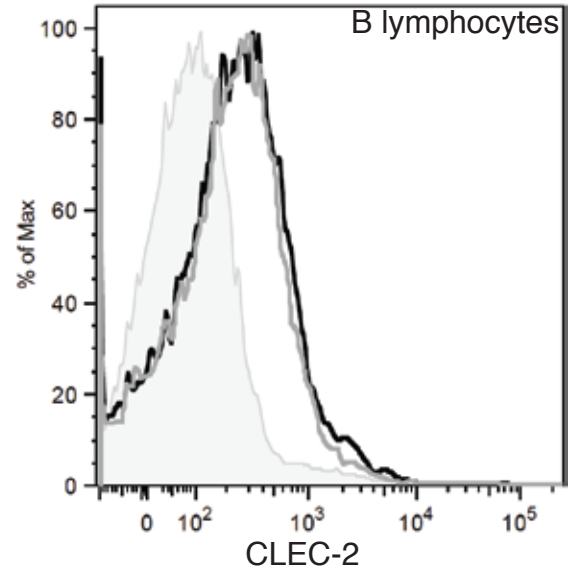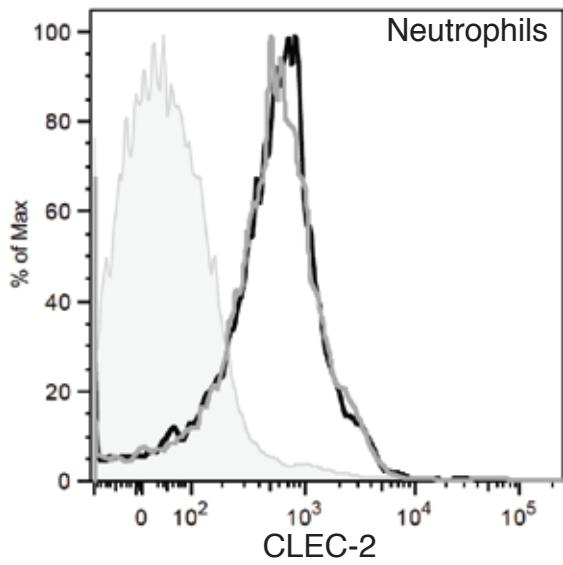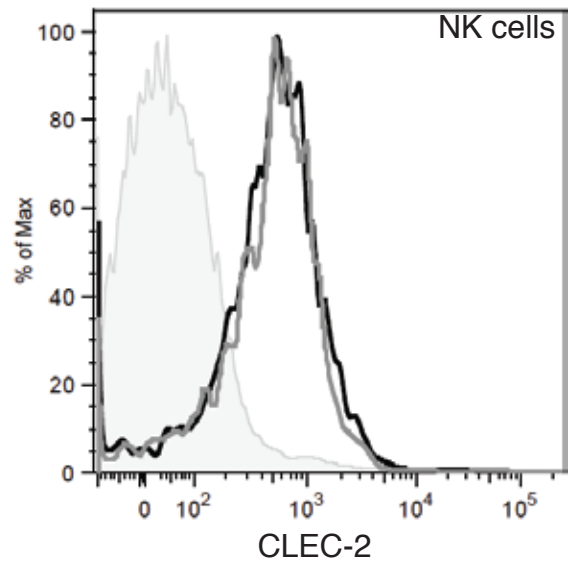

Figure S3

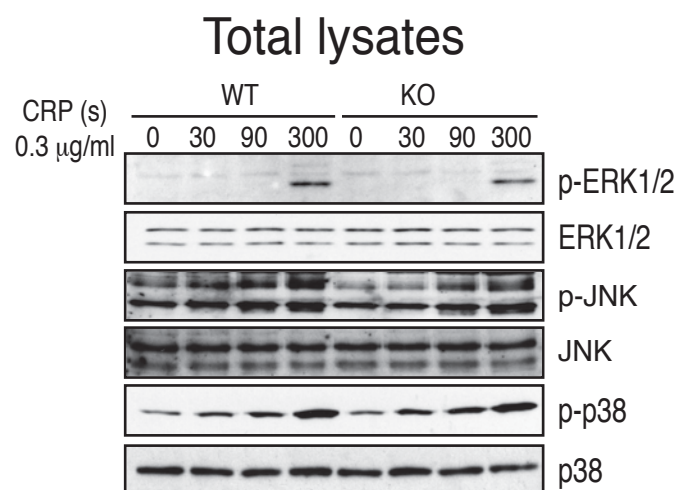



Figure S4

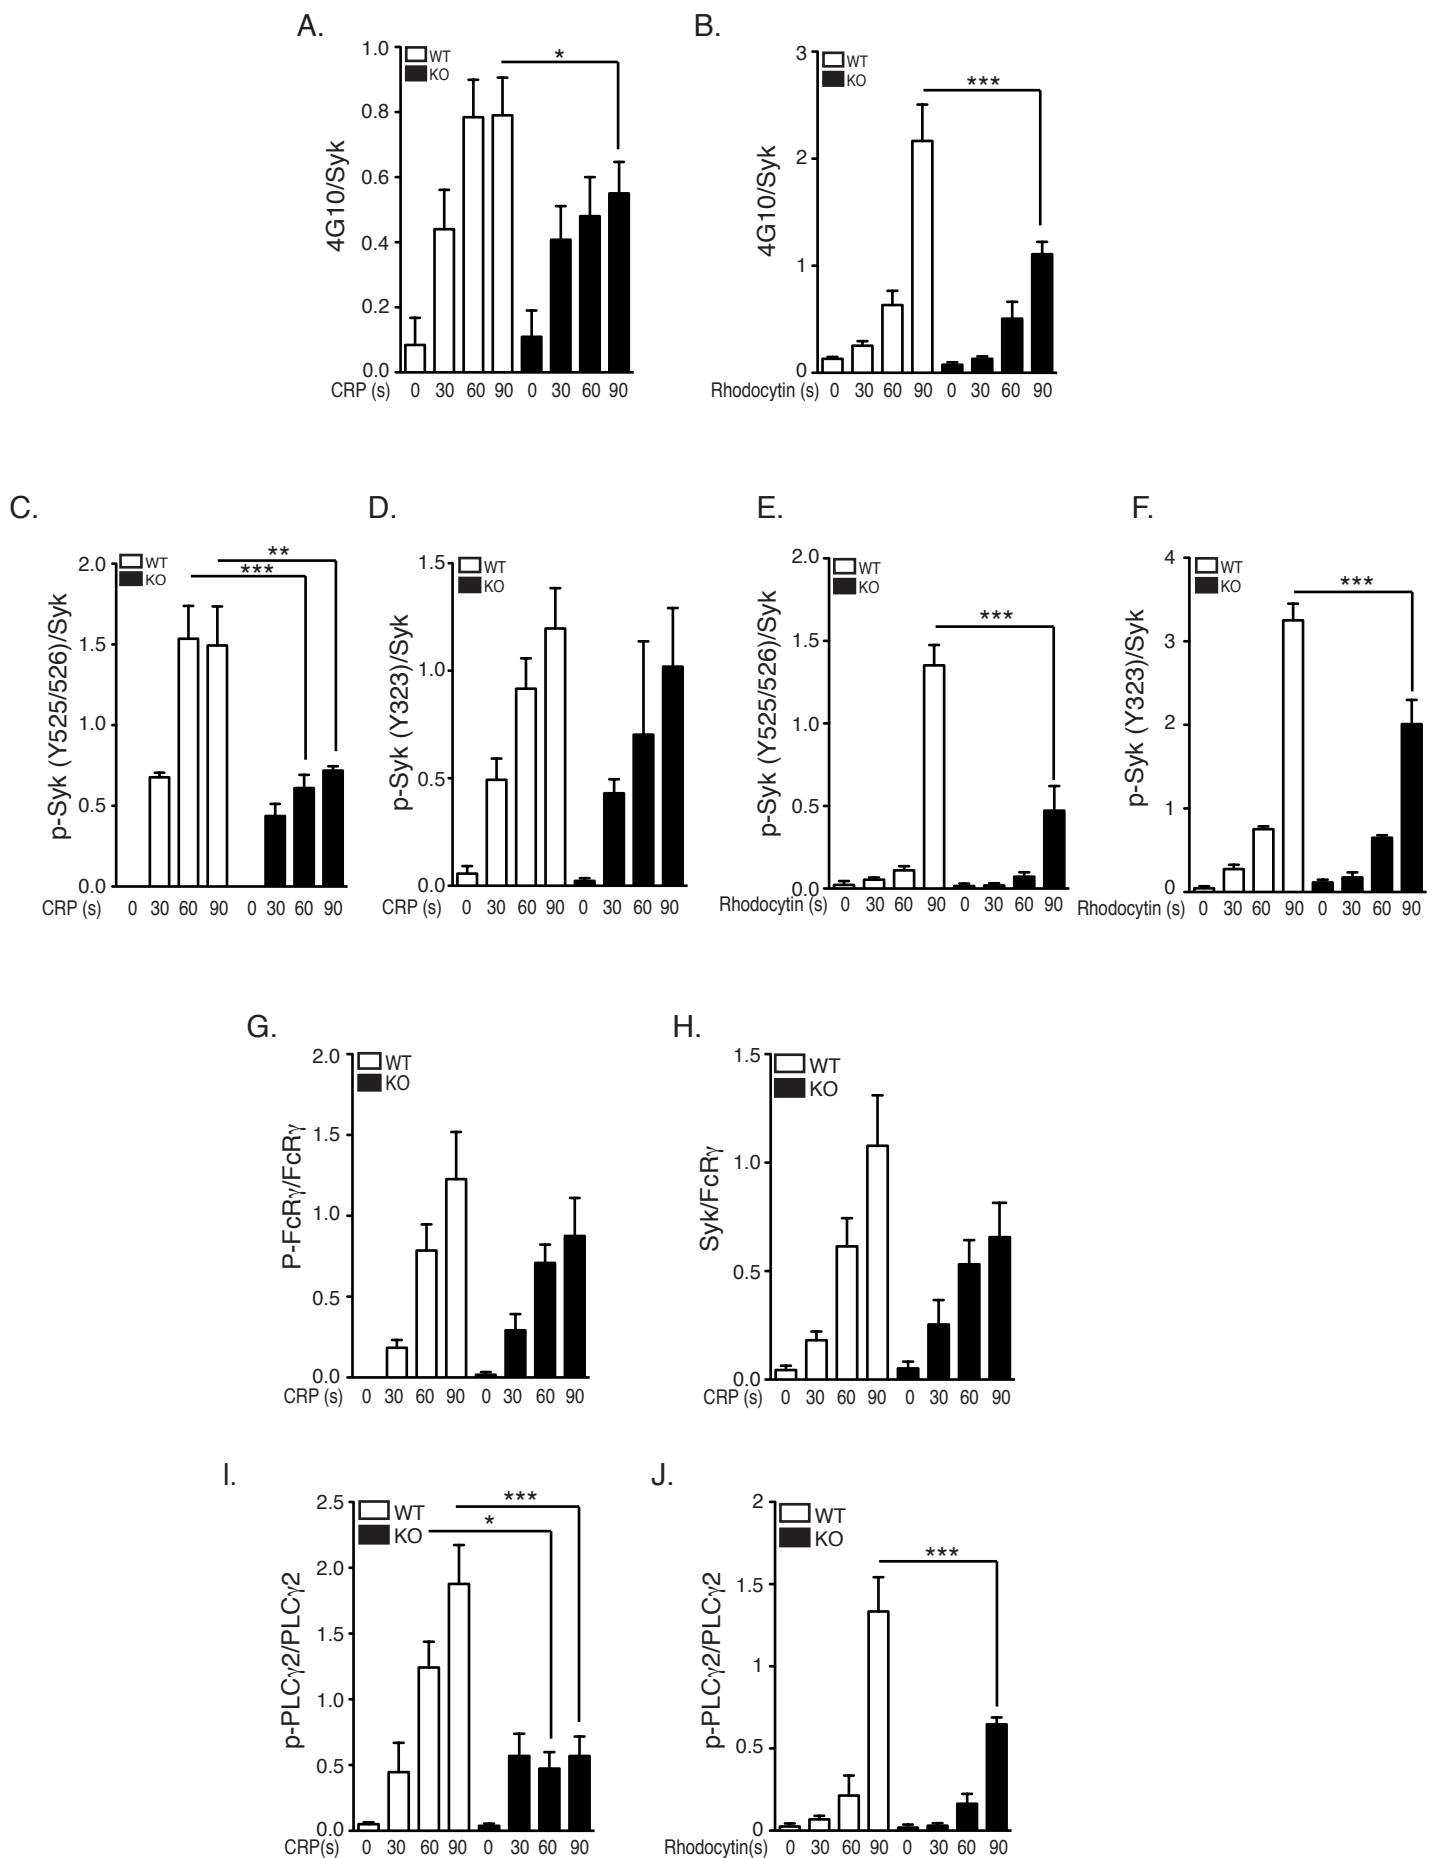

Figure S5

A. Total lysates

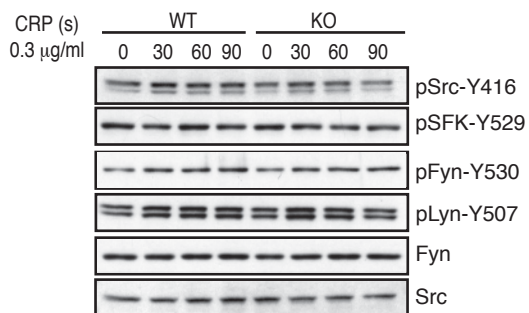

B. Total lysates

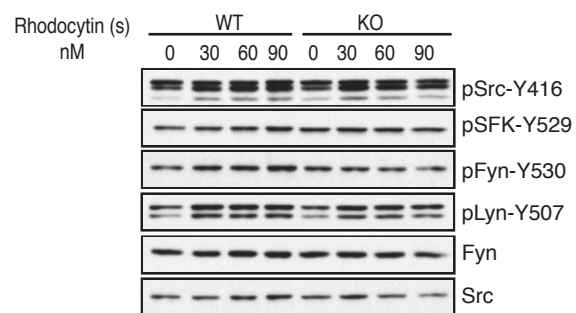

Figure S6

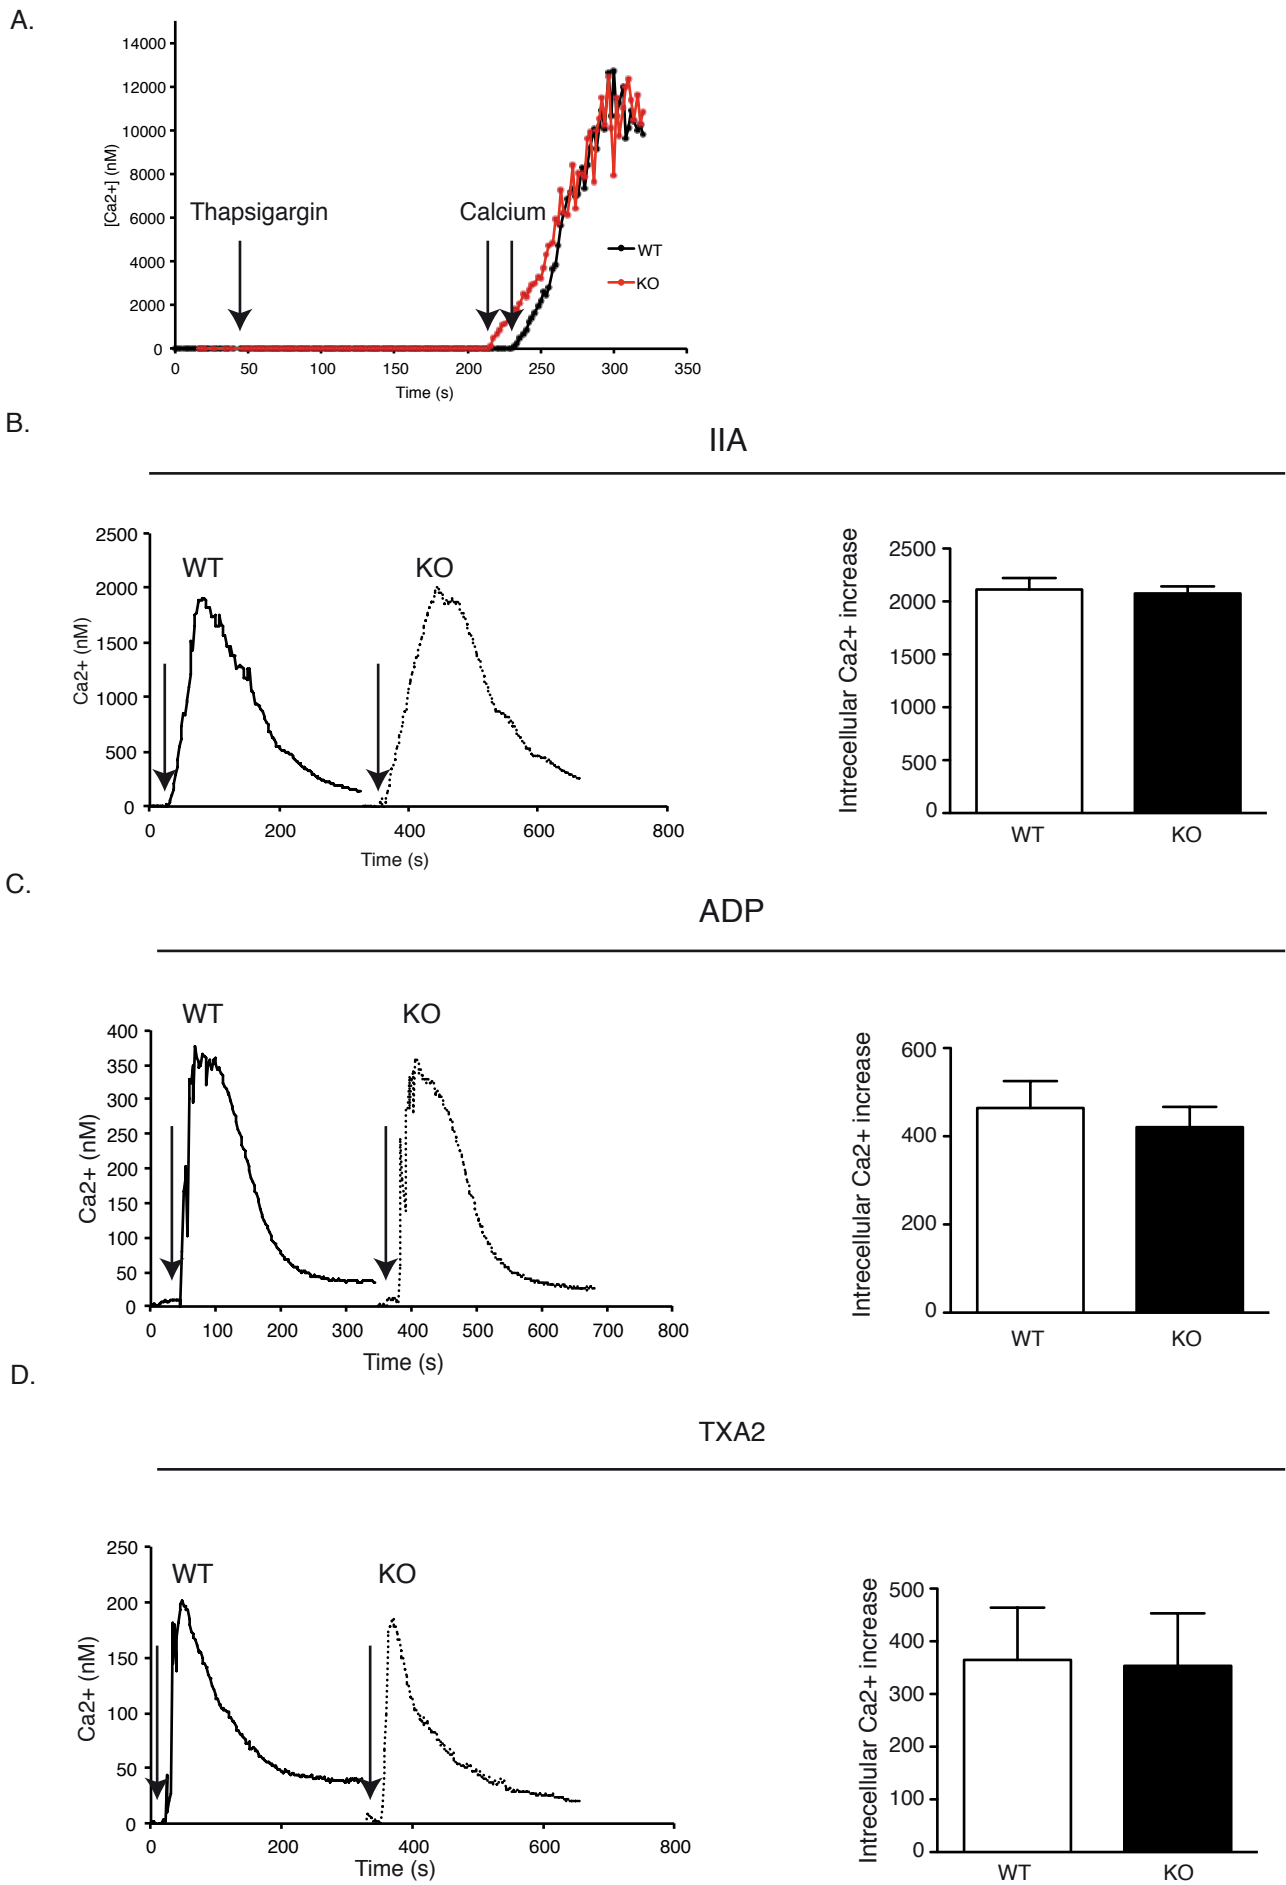

Figure S7

A.

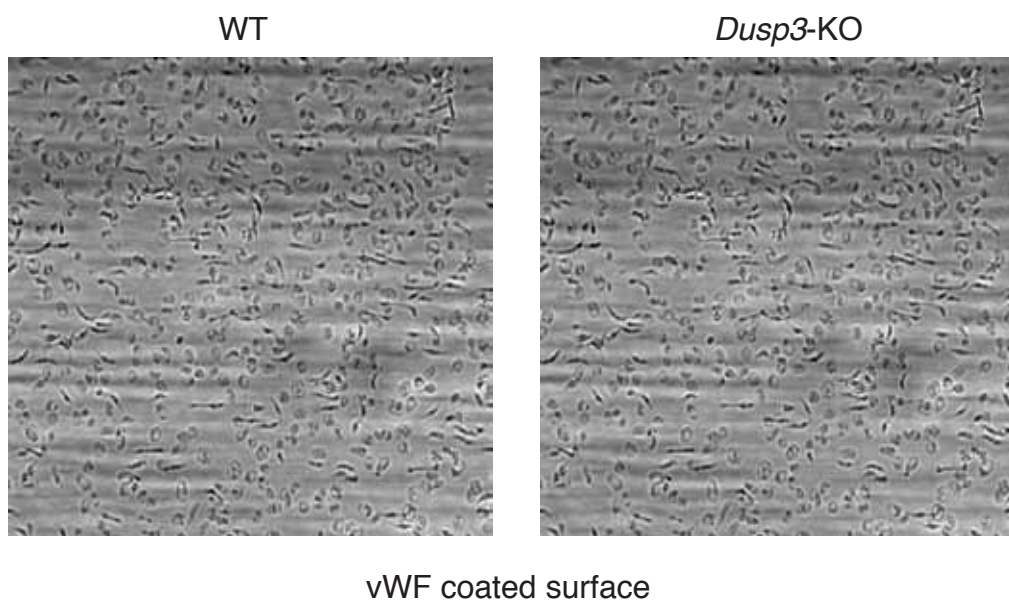

B.

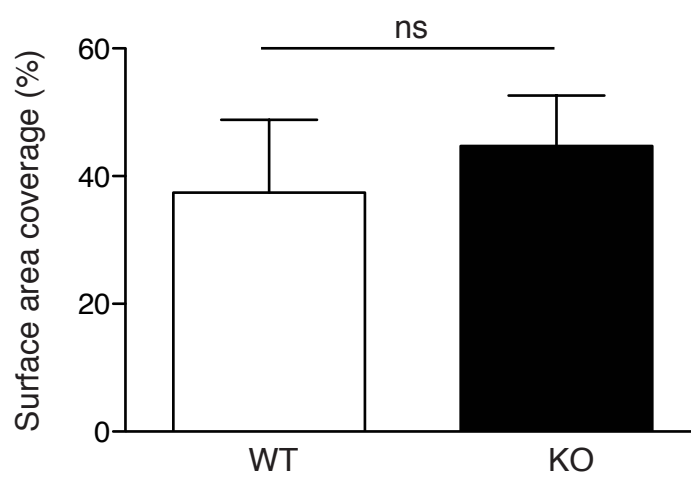

Supplement: NIHMS649645-supplement-2.pdf [file NIHMS649645-supplement-2.pdf]
